# Supplementary material for: Development of Salmon Sperm DNA/Regenerated Silk Bio-Based Films for Biomedical Studies on Human Keratinocyte HaCaT Cells under Solar Spectrum
Source: MDPI journal article supplement (doi:10.3390/jfb14050280), 2023-05-18
Supplement: s1 [file s1]

# SUPPLEMENTARY MATERIALS

## Development of Salmon Sperm DNA/Regenerated Silk Bio-Based Films for Biomedical Studies on Human Keratinocyte HaCaT Cells under Solar Spectrum

Maria Rachele Ceccarini <sup>1</sup>, Francesca Ripanti <sup>2</sup>, Veronica Raggi <sup>3</sup>, Alessandro Paciaroni <sup>2</sup>, Caterina Petrillo <sup>2</sup>, Lucia Comez <sup>4</sup>, Kevin Donato <sup>5,6</sup>, Matteo Bertelli <sup>5,6</sup>, Tommaso Beccari <sup>1</sup> and Luca Valentini <sup>7,\*</sup>

<sup>1</sup> Department of Pharmaceutical Sciences, University of Perugia, 06123 Perugia, Italy

<sup>2</sup> Department of Physics and Geology, University of Perugia, Via Alessandro Pascoli, 06123 Perugia, Italy

<sup>3</sup> Polo Scientifico Didattico, University of Perugia, Strada di Pentima 4, 05100 Terni, Italy

<sup>4</sup> Istituto Officina dei Materiali-IOM, National Research Council-CNR, Via Alessandro Pascoli, 06123 Perugia, Italy

<sup>5</sup> MAGI EUREGIO SCS, Via Maso della Pieve, 60/A, 39100 Bolzano, Italy

<sup>6</sup> MAGISNAT, Atlanta Tech Park, 107 Technology Parkway, Peachtree Corners, GA 30092, USA

<sup>7</sup> Civil and Environmental Engineering Department, University of Perugia, Strada di Pentima 6, 05100 Terni, Italy

\* Correspondence: luca.valentini@unipg.it

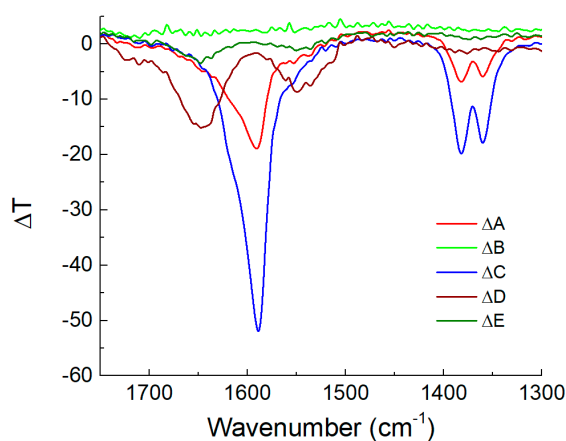

Figure S1. Transmittance variation of SF/DNA samples after the subtraction of the spectrum of SF in the infrared region.

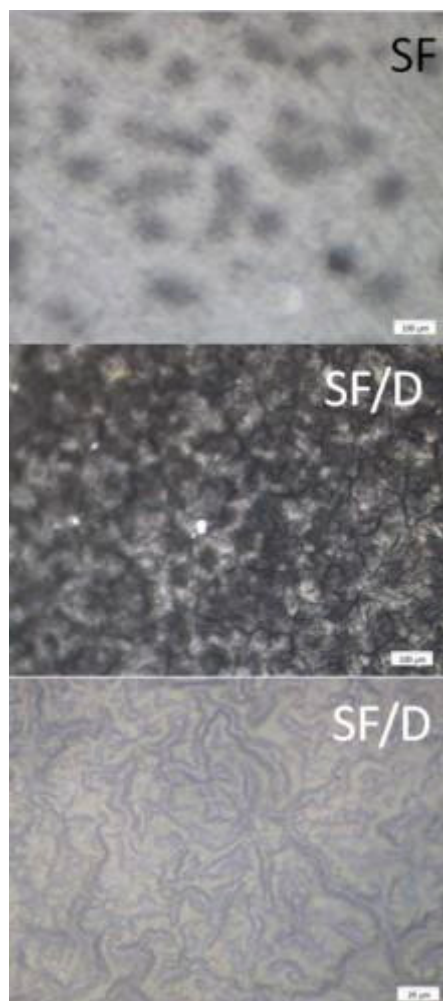

Figure S2. Optical microscopy images of SF and SF/D samples.

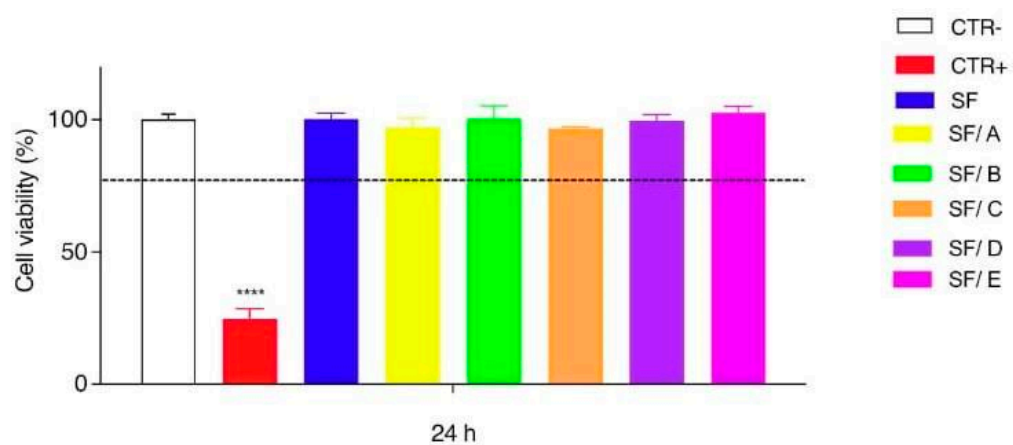

Figure S3. MTT assay on HaCaT cells after 24 h of 440 s irradiation. The SF and SF/DNA labels indicate the viability of the HaCaT cells covered with these films during the irradiation.
